# Supplementary material for: Effects of Enrofloxacin on the Epiphytic Algal Communities Growing on the Leaf Surface of Vallisneria natans
Source: MDPI journal article supplement (doi:10.3390/antibiotics11081020), 2022-07-29
Supplement: s1 [file s1]

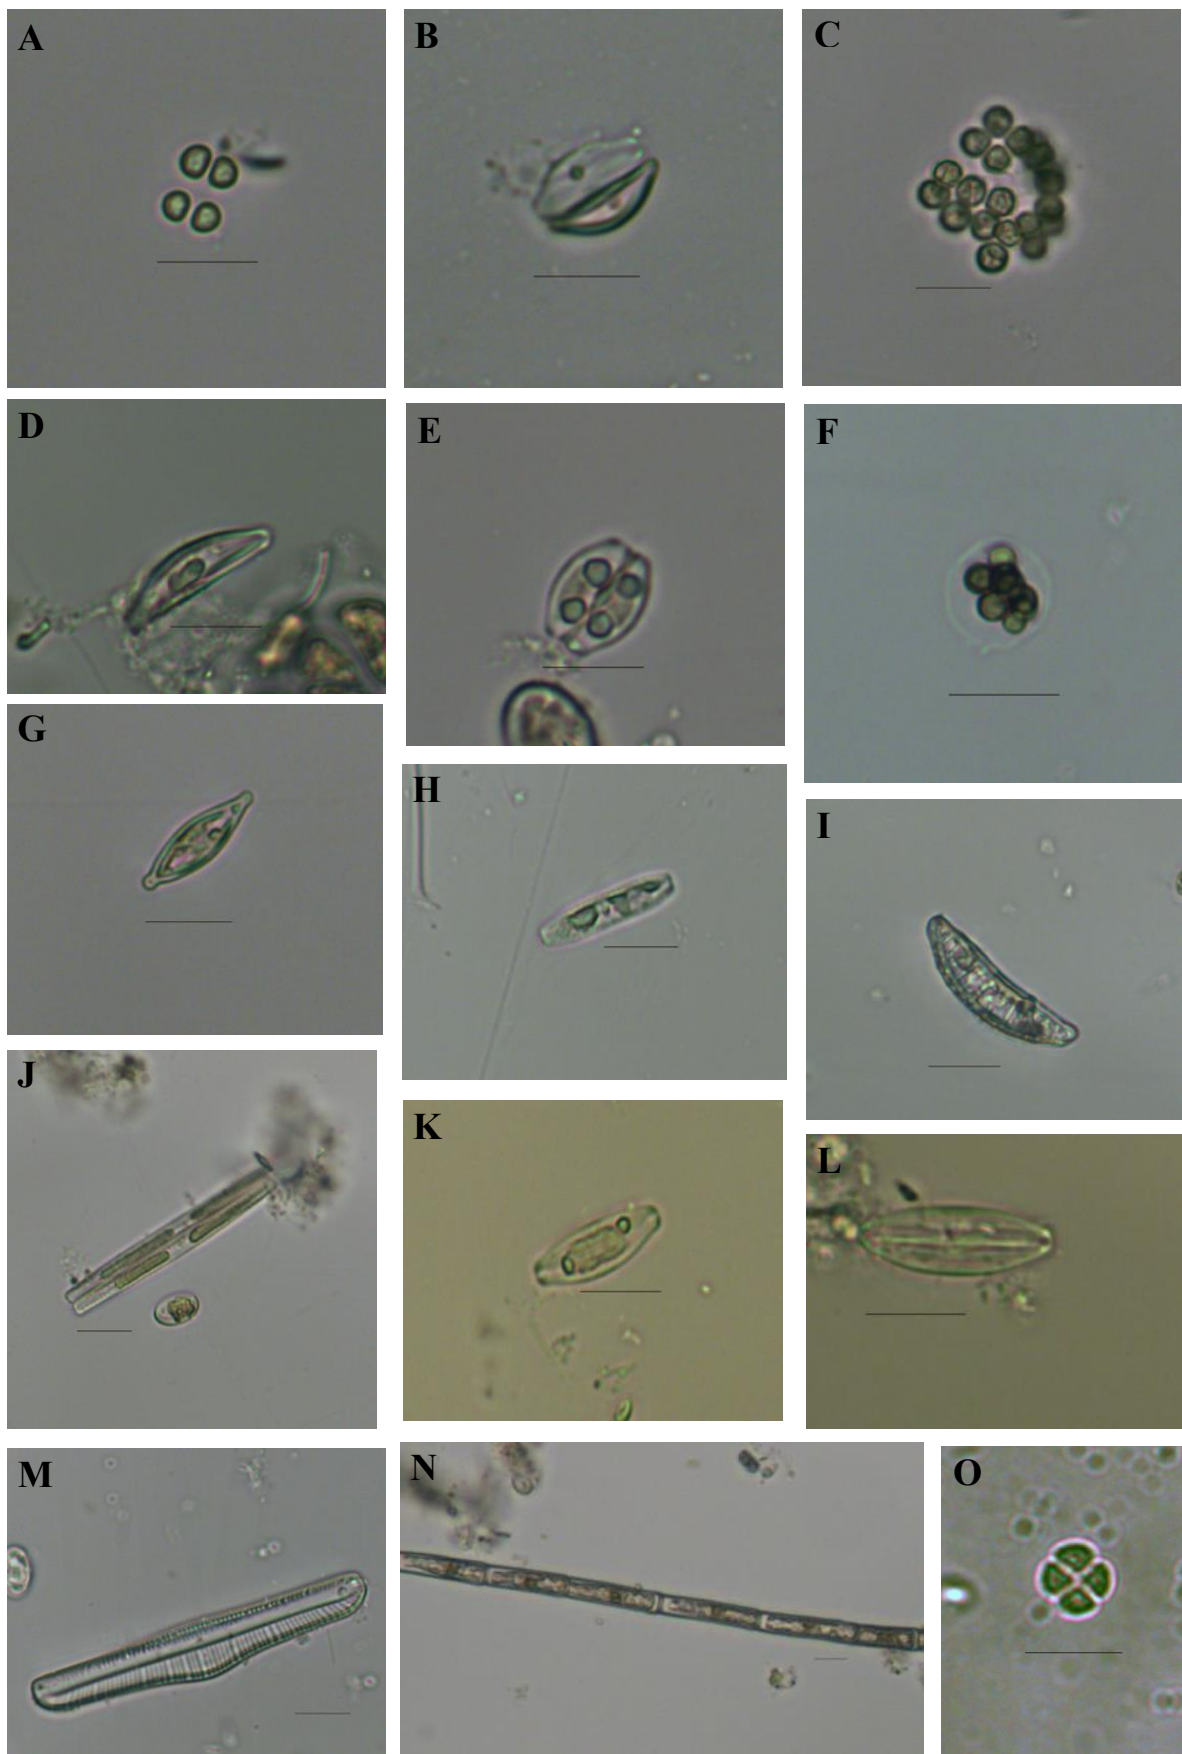

Figure S1 (continued). Epiphytic algae observed in this study. (Scale bars: 20  $\mu$ m)

A. *Chroococcus*, B. *Cymbella*, C. *Gloeocapsa*, D. *Cymbella*, E. *Cymbella*, F. *Gloeocapsa*, G. *Navicula*, H. *Navicula*, I. *Epithemia*, J. *Synedra*, K. *Cymbella*, L. *Amphora*, M. *Rhopalodia*, N. *Tribonema*, O. *Crucigenia*.
