# Supplementary material for: Effects of Enrofloxacin on the Epiphytic Algal Communities Growing on the Leaf Surface of Vallisneria natans
Source: MDPI journal article supplement (doi:10.3390/antibiotics11081020), 2022-07-29
Supplement: s1 [file s1]

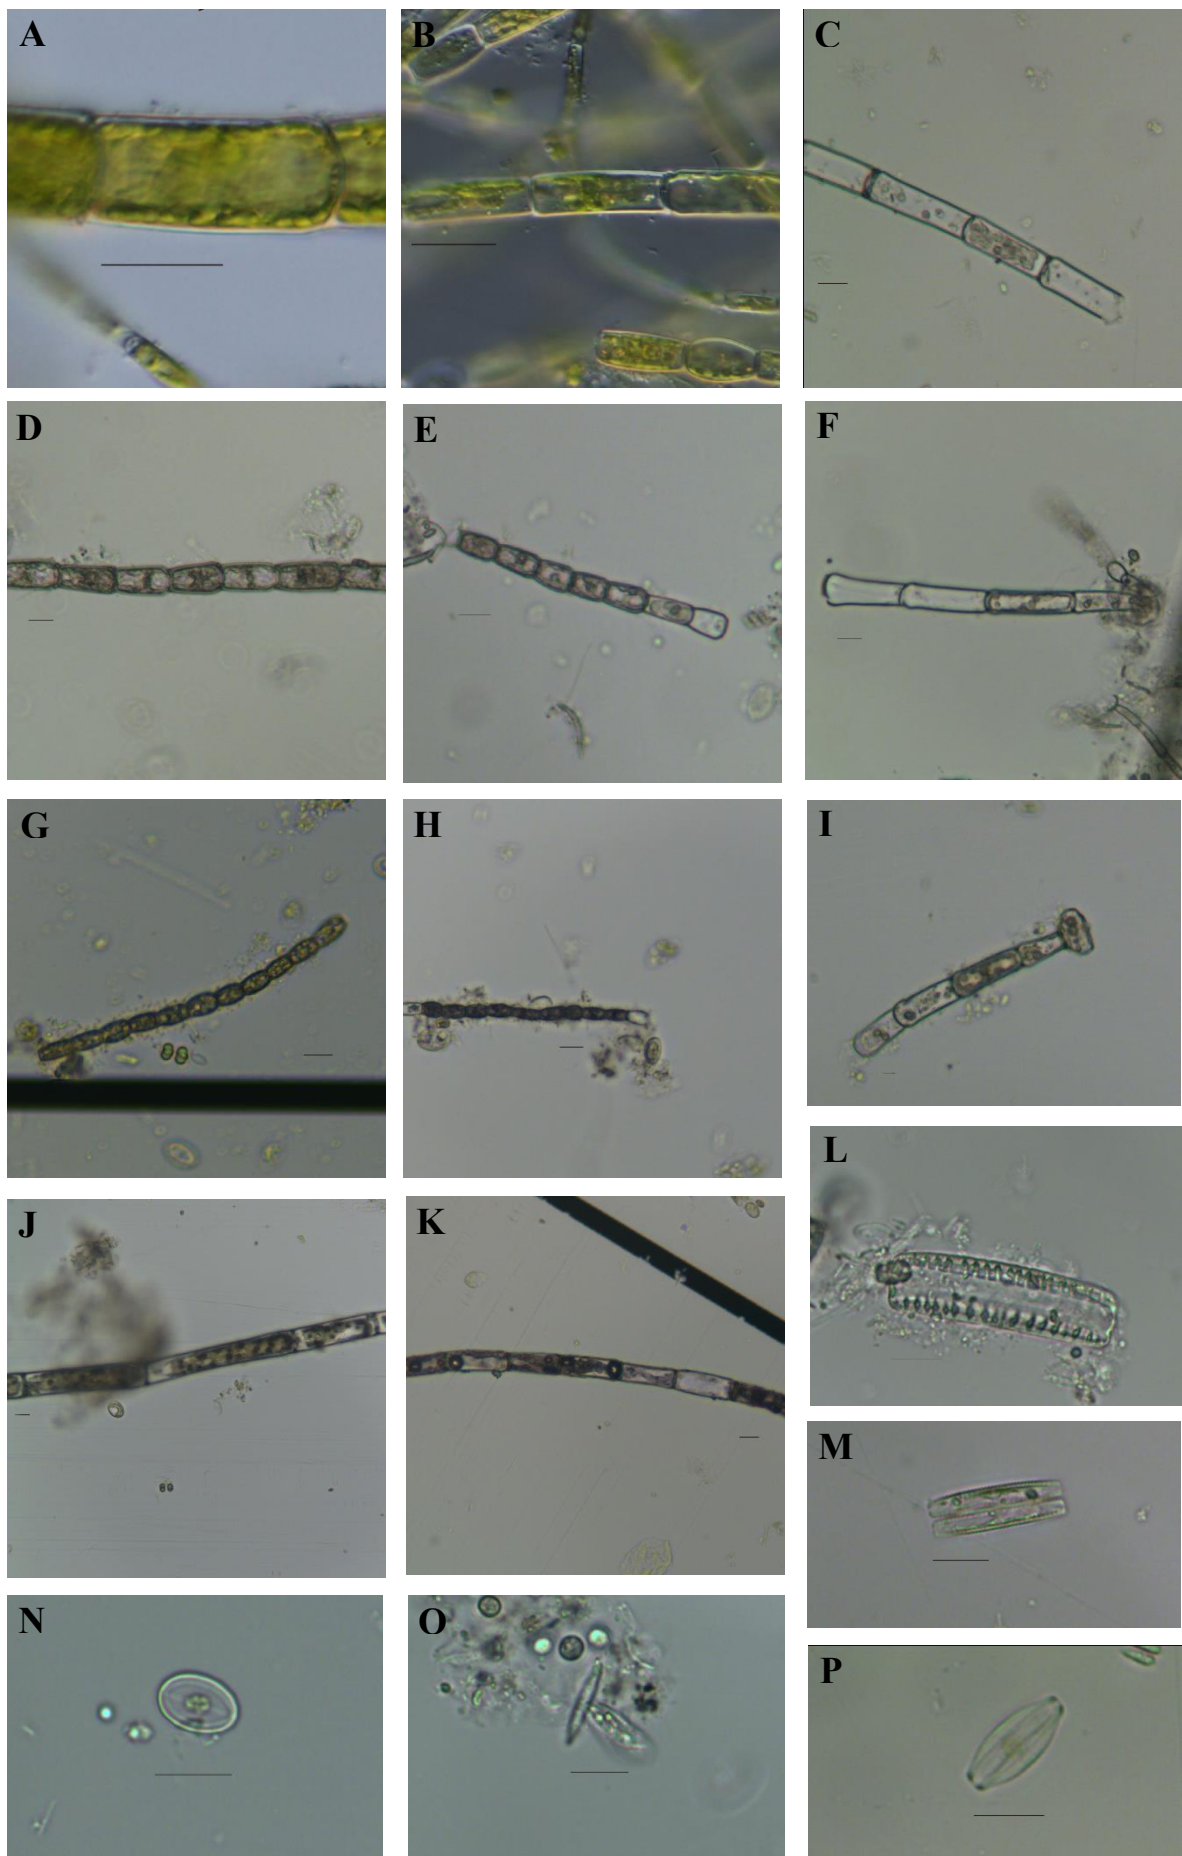

Figure S1. Epiphytic algae observed in this study. (Scale bars: 20  $\mu$ m)

A. *Microspora*, B. *Gloeotilopsis*, C. *Oedocladium*, D, E. *Ulothrix*, F. *Oedocladium*, G, H. *Tribonema*, I, J, K. *Oedocladium*, L. *Diatoma*, M. *Fragilaria*, N. *Cocconeis*, O. *Nitzschia*, P. *Amphora*
